# Supplementary material for: Effect of dietary cellulose supplementation on gut barrier function and apoptosis in a murine model of endotoxemia
Source: PubMed Central journal article supplement (PMC6886840; doi:10.1371/journal.pone.0224838), 2019-12-02
Supplement: pone.0224838.s001.pdf [file pone.0224838.s001.pdf]

Appendix A

Diet Composition

| <b>Ingredient</b>    | <b>HF Diet (g/Kg)</b> | <b>HF Diet (%)</b> | <b>BF Diet (g/Kg)</b> | <b>BF Diet (%)</b> |
|----------------------|-----------------------|--------------------|-----------------------|--------------------|
| Casein               | 200                   | 20                 | 200                   | 20                 |
| L-Cystine            | 3                     | 0.3                | 3                     | 0.3                |
| Sucrose              | 100                   | 10                 | 100                   | 10                 |
| Cornstarch           | 147                   | 14.7               | 397.4                 | 39.74              |
| Dyetrose             | 132                   | 13.2               | 132                   | 13.2               |
| Soybean Oil          | 70                    | 7                  | 70                    | 7                  |
| t-Butylhydroquinone  | 0.014                 | 0.014              | 0.014                 | 0.014              |
| Cellulose            | 300                   | 30                 | 50                    | 5                  |
| Mineral Mix #210025  | 35                    | 3.5                | 35                    | 3.5                |
| Vitamin Mix # 310025 | 10                    | 1                  | 10                    | 1                  |
| Choline Bitartrate   | 2.5                   | 0.25               | 2.5                   | 0.25               |
| Calories (kcal/kg)   | 2860                  |                    | 3760                  |                    |

HF- High Fiber (30%)

BF-Basic Fiber (5%)
